# 1 WhichTF is dominant in your open chromatin data?

2 Yosuke Tanigawa<sup>1\*</sup>, Ethan S. Dyer<sup>2,3,7\*</sup>, Gill Bejerano<sup>1,4,5,6,+</sup>

3 1. Department of Biomedical Data Science, School of Medicine, Stanford University, Stanford, CA, USA.

4 2. Stanford Institute for Theoretical Physics, Stanford University, Stanford, CA, USA

5 3. Department of Physics and Astronomy, Johns Hopkins University, Baltimore, MD, USA

6 4. Department of Developmental Biology, Stanford University, Stanford, CA, USA.

7 5. Department of Computer Science, Stanford University, Stanford, CA, USA.

8 6. Department of Pediatrics, Stanford University School of Medicine, Stanford University, Stanford, CA, USA.

9 7. Current address: Google, Mountain View, CA, USA

10 \* These authors contributed equally and ordered by age

11 + Corresponding author (G.B. bejerano@stanford.edu)

## 12 Abstract

13 We present WhichTF, a novel computational method to identify dominant  
14 transcription factors (TFs) from chromatin accessibility measurements. To rank TFs,  
15 WhichTF integrates high-confidence genome-wide computational prediction of TF binding  
16 sites based on evolutionary sequence conservation, putative gene-regulatory models, and  
17 ontology-based gene annotations. Applying WhichTF, we find that the identified dominant  
18 TFs have been implicated as functionally important in well-studied cell types, such as NF-  
19  $\kappa$ B family members in lymphocytes and GATA factors in cardiac tissue. To distinguish the  
20 transcriptional regulatory landscape in closely related samples, we devise a differential  
21 analysis framework and demonstrate its utility in lymphocyte, mesoderm developmental,  
22 and disease cells. We also find TFs known for stress response in multiple samples,  
23 suggesting routine experimental caveats that warrant careful consideration. WhichTF yields  
24 biological insight into known and novel molecular mechanisms of TF-mediated  
25 transcriptional regulation in diverse contexts, including human and mouse cell types, cell  
26 fate trajectories, and disease-associated tissues.

## 27 Introduction

28           Transcription factors (TFs) are the master regulators of development. They define,  
29 refine, and can even divert cellular trajectories. TFs perform these important tasks by  
30 binding to specific DNA sequences in open chromatin, where they recruit additional co-  
31 factors and together modulate expression of downstream genes. TFs regulate biological  
32 processes in healthy adult tissues, and mutations to both TF genes and their genomic binding  
33 sites have been linked with human disease<sup>1,2</sup>.

34           The advent of next generation sequencing has paved the way for chromatin  
35 immunoprecipitation followed by sequencing (ChIP-seq)-based methods for the discovery  
36 of genome-wide loci where a given TF binds DNA in a given cell population<sup>3</sup>. Tools  
37 developed for the analysis of ChIP-seq data, such as GREAT<sup>4</sup> (Gene Regulatory Enrichment  
38 of Annotations Tool), have discovered and leveraged a compelling phenomenon: when a TF  
39 is functionally important for the progression of a certain process, such that its perturbation  
40 leads to the disruption of this process, the binding sites for this TF are often highly enriched  
41 in the gene regulatory domains of the “downstream” target genes that drive this process<sup>4</sup>.

42           TFs work in different combinations to enact a vast repertoire of cellular fates and  
43 responses<sup>5</sup>. Between 1,500-2,000 TFs are thought to be encoded in the human genome<sup>1</sup>.  
44 Performing ChIP-seq for more than a handful of TFs in any cellular context is an expensive  
45 laborious procedure, while the assaying of hundreds of TFs even in the same cell state is  
46 impractical except in a handful of settings, by the most lavishly funded consortia.

47           To obtain a more comprehensive view of transcriptional regulation in action,  
48 experimental focus has turned from the assaying of individual TFs to the assaying of all  
49 open chromatin in a given cellular context. These DNase-seq, ATAC-seq, or single-cell

50 ATAC-seq accessibility profiles offer a proxy for all cis-regulatory elements active in a  
51 given cellular state<sup>6-8</sup>.

52 While assaying all TFs is infeasible, many hundreds of TFs have been studied in one  
53 or more cellular contexts, or via complementary methods (such as protein binding  
54 microarrays or high-throughput SELEX), to obtain the DNA binding preference of the TF<sup>1</sup>.  
55 These hundreds of TF binding motifs can then be used to predict transcription factor binding  
56 sites (TFBSs) for all characterized TFs in various context-specific sets of accessible  
57 chromatin.

58 Very often, biological processes of interest are conserved at the genome sequence  
59 level across closely related species, such as primates or mammals. As such, computational  
60 tools like PRISM<sup>9</sup> (Predicting Regulatory Information for Single Motifs) can be used to  
61 obtain a rarefied subset of binding site predictions that are both observed to be positioned in  
62 open chromatin and conserved orthologously in additional species. Because these sites  
63 evolve under purifying selection, they are more likely to be individually important in the  
64 probed context<sup>9</sup>.

65 Here, we innovate on the foundation of two tools our group previously developed:  
66 PRISM<sup>9</sup> for the prediction of evolutionarily conserved binding sites for hundreds of human  
67 and mouse TFs, and GREAT<sup>4</sup> for the detection of functions enriched in gene regulatory  
68 regions. We use insights from both to develop WhichTF, a tool that applies a novel  
69 statistical test to identify the most dominant TFs within a set of user-specified open  
70 chromatin regions. In this work, dominant TFs refer to TFs whose conserved binding sites  
71 are enriched within functionally-coherent regions of the input open chromatin regions. We  
72 show that our molecular definition of dominance successfully predicts biologically

73 important factors in the context of different cell types, differentiation pathways, and even  
74 disease associated cellular sets.

## 75 Results

### 76 WhichTF Approach Overview

77 In order to predict dominant TFs, WhichTF relies on both functional genome  
78 annotations from GREAT and pre-curated, conservation-based predictions of TFBSs from  
79 PRISM. As such, we use GREAT in conjunction with the mouse genome informatics (MGI)  
80 phenotype ontology to annotate all genes in the human GRCh38 (hg38) and mouse  
81 GRCm38 (mm10) genomes with a canonical transcription start site (TSS), a putative gene  
82 regulatory domain, and any MGI phenotypes known to be affected by mutations to the  
83 associated gene. This procedure yields more than 700,000 gene-phenotype relationships for  
84 each genome (**Fig. 1a**, step 1)<sup>4,10-12</sup>. We also use PRISM to predict mammalian conserved  
85 TFBSs using 672 manually curated PWMs from 569 TFs across the entire genome<sup>9</sup>. The  
86 updated PRISM predictions resulted in 268 million and 161 million putative TFBSs for the  
87 human and mouse genomes, respectively (**Fig. 1a**, step 2).

88 To confirm the utility of restricting ourselves to regulatory domains of highly  
89 enriched ontology terms, we evaluated the relative enrichment in the number of TFBSs  
90 within the input open chromatin region as a baseline method (**Online Methods**). We found  
91 the baseline results are often overloaded with TFs associated with general housekeeping  
92 processes (**Supplementary Table S1**). We therefore turned to focus on the top 100 enriched  
93 terms (**Online Methods**).

94 For a given query (**Fig. 1a**, step 3), WhichTF uses functional annotations to enhance  
95 its prediction of dominant transcription factors. This is accomplished by computing TF  
96 enrichments in only a restricted, particularly relevant, subset of the user's input. Specifically,  
97 WhichTF uses GREAT to identify enriched ontology terms within the user's input query.  
98 Each term is associated with a region of the genome corresponding to all of the regulatory  
99 domains of genes annotated with that term. WhichTF selects the top 100 ontology terms.  
100 For each term and every TF, WhichTF counts the number of binding sites falling in the  
101 intersection of the user-specified accessible regions and the region of the genome associated  
102 to the term of interest (**Fig. 1a**, step 4), and computes enrichment statistics, represented as a  
103 TF-by-term enrichment matrix (**Fig. 1b**). Aggregating over the functional terms, WhichTF  
104 computes a novel score and significance used for ranking TFs (**Fig. 1c, Online Methods**).  
105 The top-ranked TFs are hypothesized to be functionally relevant TFs in a cell exhibiting the  
106 indicated accessibility profile.

### 107 **WhichTF identifies functionally important TFs across diverse cell types**

108 To test the ability of WhichTF to identify functionally important TFs across different  
109 cell types, we applied WhichTF to DNase-seq profiles and found that the predicted  
110 dominant TFs are often confirmed to be functionally relevant by perturbation studies (**Fig.**  
111 **2a**). In B- and T-cells, for example, we identified TFs in the NF- $\kappa$ B pathway, which are key  
112 factors in lymphocyte development and adaptive immunity<sup>13</sup>. In embryonic heart tissue, we  
113 found GATA-4, -5, and -6 – known regulators of cardiac development and growth that,  
114 when perturbed, have been implicated in human congenital heart disease<sup>14</sup>. In embryonic  
115 hindbrain tissue, we found SOX2, a critical regulator of neural progenitor pluripotency and  
116 differentiation in embryogenesis and later development, including adult hippocampal

117 neurogenesis<sup>15-17</sup>. WhichTF yielded similar biologically meaningful results from the  
118 corresponding cell types for mouse DNase-seq datasets (**Supplementary Table S2**),  
119 suggesting that WhichTF can highlight both the identity and evolutionarily conserved  
120 binding sites of key TFs from open chromatin in diverse contexts across species.

## 121 **WhichTF robustly quantifies biologically meaningful similarities and differences in** 122 **TF-mediated transcriptional programs**

123 Precise knowledge of cell state and identity is crucial for understanding normal  
124 development and disease. To assess whether WhichTF can quantitatively and robustly  
125 capture biologically meaningful similarities and differences in TF-mediated transcriptional  
126 programs, we applied a t-distributed stochastic neighbor embedding (t-SNE) analysis to  
127 WhichTF score vectors computed for 90 samples across 7 cell types<sup>18</sup>. We found brain, lung,  
128 and hematopoietic cells are mapped to distinct regions (**Fig. 2b**). Furthermore, we saw fine-  
129 grained substructures among closely related samples. For example, we observed a clear  
130 separation of GM12878, B-cells, and T-cells. Reassuringly, different samples from the same  
131 biological tissue, such as left ventricle, right ventricle, and heart, showed no clear separation.

## 132 **WhichTF identifies differentially dominant TFs for closely related cell types**

133 B-cells and T-cells share a closely related developmental trajectory<sup>13</sup>. As Fig. 2a  
134 shows, WhichTF identified NF- $\kappa$ B family members NFKB1, RELA, and RELB as shared  
135 dominant TFs. WhichTF also identified lineage-specific factors, such as SPI-B for B-cells  
136 and RUNX3 for T-cells (**Fig. 2a**). SPI-B is an ETS family TF known to play a key role in B-  
137 cell development and function, and environmental response<sup>19-21</sup>. RUNX3, in contrast, play  
138 T-cell-specific functional roles, such as in CD4 versus CD8 thymocyte commitment, helper

139 versus killer T-cell specification, and helper type selection<sup>22</sup>. These differential roles for  
140 SPI-B and RUNX3 are corroborated by their cell-type-specific expression in B-cells and T-  
141 cells, respectively (**Fig. 3a**)<sup>23</sup>.

142 Although we identified multiple TFs distinguishing B- and T-cells, the results are  
143 dominated by common factors. This is reasonable, as they share most of their developmental  
144 program<sup>13</sup>. To identify TFs with relative dominance from a given pair of samples, we  
145 developed a differential analysis framework focusing on uniquely accessible regions only in  
146 one sample (**Online Methods**). In B-cells, the differential analysis highlighted additional  
147 ETS family members, PU.1 and SPI-C. These TFs are essential for healthy B-cell  
148 differentiation and function (**Fig. 3b**). In T-cells, we saw an additional RUNX family  
149 member, RUNX1, as well as CBF $\beta$  (**Fig. 3b**) – both are functionally relevant in T-cells.  
150 Indeed, RUNX1, RUNX3 and CBF $\beta$  form a complex and are crucial for the healthy function  
151 of T-lymphocytes<sup>32</sup>.

## 152 **WhichTF identifies differentially dominant TFs along developmental trajectories**

153 TFs regulate cell fate decisions in animal developmental programs<sup>1</sup>. To gain insights  
154 into the molecular mechanisms influencing cellular differentiation, we applied WhichTF to  
155 ATAC-seq data from timepoints along mesoderm development to identify differentially  
156 dominant TFs that distinguish cell fates at each step along the trajectory, from human  
157 embryonic stem cells (ESCs) to early somite vs. cardiac mesoderm (**Fig. 4**)<sup>24</sup>.

158 The first step of mesoderm development is the differentiation from ESCs to anterior  
159 (APS) or mid (MPS) primitive streak (PS) cells. In both APS and MPS cells, we found  
160 WNT signaling TFs, such as TCF7L2 and LEF1, as well as T-box family TFs, such as TBX-  
161 2 and -3 (**Fig. 4a-b**). WNT signaling is involved in PS differentiation and is crucial in

162 inducing PS cell types<sup>24</sup>. T-box family members also play key roles in PS development.  
163 TBX6 is a canonical PS marker, and the specific loss of *Eomes* (a.k.a. *Tbr2*), causes ectopic  
164 primitive streak formation in mice<sup>24,25</sup>. The specific T-box family member TBX3, ranked  
165 third in APS cells, has been implicated in early stage of differentiation towards mesoderm  
166 from ESCs in mouse and *Xenopus* and has been reported for its functional redundancy with  
167 *Tbx2* during *Xenopus* gastrulation<sup>26</sup>. RUNX3, our top hit for APS, shows conserved  
168 expression in mouse neuromesodermal progenitor (NMP) cells and human D3-NMP-like  
169 cells. Interestingly, we also found previously unreported T-box family TFs, TBX15 and  
170 TBR1, of which TBX15 is linked to decreased skeletal muscle mass in mouse<sup>12</sup> and known  
171 for tissue-specific expression in muscle, a tissue developed from the mesoderm lineage  
172 (**Supplementary Figure S1**).

173 In paraxial mesoderm, we found WNT signaling TFs, which promote paraxial and  
174 suppress lateral mesoderm (**Fig. 4c**)<sup>24</sup>. We also find HOXC13, necessary for proper  
175 development of the paraxial mesoderm into the presomatic mesoderm<sup>27</sup>. In early somites,  
176 we found MEIS2 and ZIC2, which are required in development of cranial and cardiac neural  
177 crest and somite cells, respectively (**Fig. 4d**)<sup>28,29</sup>.

178 In lateral mesoderm, we found multiple GATA family members, of which GATA4 is  
179 a downstream effector of BMP signaling in lateral mesoderm (**Fig. 4e**)<sup>30</sup>. We also saw  
180 *RUNX3*, which is co-expressed with *RUNX1* in lateral mesoderm<sup>31</sup>; both are necessary for  
181 hematopoiesis<sup>22,32</sup>. GLI1, a key TF in hedgehog (HH) signaling, is necessary for  
182 establishing left-right asymmetry in lateral mesoderm<sup>33</sup>. In cardiac mesoderm, we found  
183 FOS TFs, GATA TFs, and GLI1 (**Fig. 4f**). Interestingly, FOSL2 regulates the rate of  
184 myocardial differentiation<sup>34</sup>, and HH signaling via GLI1 is required for secondary heart



185 field development<sup>35</sup>. As mentioned above, GATA factors are canonical drivers of cardiac  
186 development and all the GATA family members identified for mesoderm development  
187 (GATA-1, -2, -4, and -6) are implicated in Human cardiovascular diseases<sup>14,2</sup>.

## 188 **WhichTF identifies potentially disease-relevant TFs**

189 Transcriptional mis-regulation has a broad impact on human diseases<sup>2</sup>. To assess  
190 whether WhichTF can shed light on the transcriptional regulatory molecular basis of human  
191 disorders, we examined systemic lupus erythematosus (SLE) as a case study. SLE is a  
192 heterogeneous and chronic autoimmune disorder most prevalent in young women and  
193 affecting 0.1% of the population. Its genetic and epi-genetic bases are poorly understood  
194 with known genetic associations accounting for only 10-20% of the observed heritability.  
195 While SLE is characterized by mis-regulated immune response in T- and B-cells, few TFs  
196 have been identified to play functionally relevant roles in SLE<sup>36</sup>.

197 To better understand the regulatory landscape of SLE, we identified differentially  
198 dominant TFs in healthy B-cells compared to SLE-affected B-cells and vice versa by  
199 applying WhichTF to ATAC-seq datasets<sup>37</sup>. We found BCL6 as a differentially dominant  
200 TF in healthy vs. SLE B-cells (**Table 1**). BCL6 is an important marker of T-helper follicular  
201 cells, a T-cell subtype which has been found to be mis-regulated in SLE<sup>38</sup>. Other  
202 differentially dominant TFs and their corresponding genes are implicated in autoimmune  
203 disorders (**Table 1**). A sonic hedgehog (SHH)-Gli signaling pathway member GLI1 is  
204 involved in pathogenesis of rheumatoid arthritis through synovial fibroblast proliferation<sup>39</sup>.  
205 A common genetic variant in *TCF7L2*, which is known for type 2 diabetes risk allele,  
206 discriminates autoimmune from non-autoimmune type 1 diabetes in young patients<sup>40</sup>. In a

207 model system to study multiple sclerosis, ZEB1 is suggested as a regulator of experimental  
208 autoimmune encephalomyelitis<sup>41</sup>.

### 209 **WhichTF uncovers stress response signatures**

210 Context-specific measurements of open chromatin typically require purification of  
211 the desired cell type through mechanical and enzymatic tissue dissociation, which can be  
212 quite taxing on the cells. Indeed, it has been reported that stress response factors are often  
213 highly expressed in dissociated tissues<sup>42</sup>. Corroborating these observations, WhichTF often  
214 identifies canonical stress-associated TFs as some of the most dominant TFs in multiple  
215 very different contexts. As an illustration, we present WhichTF results for additional  
216 DNase-seq datasets (**Table 2**). For three endothelial cell types and adrenal gland cells, we  
217 found many members of FOS/AP-1 and NF- $\kappa$ B TFs, which are both known for their roles in  
218 stress response. We also found ZFP410 (also known as ZNF410), a poorly characterized  
219 Zinc finger TF, among the top hits across multiple cell types, suggesting its potential role in  
220 stress response. Even in the samples dominated by stress-associated TFs, we still found  
221 well-known context-specific players among the top hits, such as GATA3 and WT-1 in  
222 kidney cells and SOX and FOX TFs in endothelial cells<sup>43-45</sup>. We also found that the  
223 boundary between stress response and cell-type specific functions can be ambiguous, or at  
224 least context dependent. For example, we found FOS/AP-1 and NF- $\kappa$ B dominant in  
225 keratinocytes and B-cells, respectively which, in addition to being stress-associated, are also  
226 known for their context-specific functions<sup>13,46</sup>.

## 227 Discussion

228 We present WhichTF, a novel computational method to identify and rank known or  
229 novel dominant TFs in any given set of accessible chromatin regions or through pairwise  
230 differential analysis of related samples. The WhichTF score is built on high confidence  
231 PRISM<sup>9</sup> predictions of conserved TFBSs as well as gene regulatory domain and ontological  
232 annotation models from GREAT<sup>4</sup>. Applying WhichTF to dozens of samples across diverse  
233 biological contexts, such as multiple cell types, developmental programs, and disease  
234 samples, we found that the functional relevance of the identified dominant TFs is often  
235 supported or suggested by published literature.

236 WhichTF identifies not only cell-type specific TFs, but factors reflecting biological  
237 processes shared among multiple samples. One such example in our result, corroborated by  
238 previous expression profiling, suggests stress response due to cellular dissociation is a  
239 shared process<sup>42</sup>. In addition to previously identified factors, we report an under-  
240 characterized Zinc finger protein, ZNF410, as a TF potentially involved in cellular stress  
241 response. The identification of stress associated TFs suggests WhichTF may serve as a  
242 useful quality control of chromatin accessibility data.

243 As we have demonstrated above, WhichTF is broadly applicable. WhichTF takes as  
244 input any form of chromatin accessibility measurement for either human or mouse, the two  
245 most studied genomes. Our illustrative examples span both species and assay types, such as  
246 DNase-seq and ATAC-seq. When combined with emerging single-cell accessibility  
247 profiling technologies<sup>8</sup>, WhichTF will provide systematic characterization of dominant TFs  
248 across a spectrum of cell-types. For example, application of WhichTF to datasets from  
249 large-scale projects, such as the Human Cell Atlas project<sup>47</sup>, has the potential to discover

250 dominant TFs for each cell type and binding sites of those TFs. Moreover, our differential  
251 analysis framework will help in understanding how closely related cell types diverge by  
252 providing hypotheses of differentially important TFs.

253           The resources made available with this study, including WhichTF and the GREAT  
254 update, provide an excellent foundation for investigating the molecular mechanisms of TF-  
255 mediated cis-regulation. Together, these results highlight the benefit of combining  
256 experimental characterization of chromatin accessibility, high-quality TFBS reference  
257 datasets, and ontological genome annotation, suggesting that systematic identification of  
258 dominant TFs across a large number of samples will be a powerful approach to understand  
259 molecular mechanisms of gene regulation and their influence on cell type differentiation,  
260 development, and disease.

261

## 262 Online Methods

### 263 GREAT v.4.0.4 update

264 We performed a major update of Genomic Regions Enrichment of Annotations Tool  
265 (GREAT)<sup>4</sup> and released it as version 4.0.4. GREAT currently supports the human (*Homo*  
266 *sapiens* GRCh38 and GRCh37/hg19) and mouse (*Mus musculus* GRCm38/mm10 and  
267 NCBI37/mm9) genomes. We obtained Ensembl gene sets from the following Ensembl<sup>48</sup>  
268 versions:

- 269 • Human GRCh38: Ensembl version 90
- 270 • Human GRCh37: Ensembl for GRCh37 version 90
- 271 • Mouse GRCm38: Ensembl version 90
- 272 • Mouse NCBI37: Ensembl version 67

273 By focusing on the set of genes with at least one Gene Ontology (GO) annotation<sup>10,11</sup> as  
274 described before<sup>4</sup>, we defined putative gene regulatory domains for 18,777 (GRCh38),  
275 18,549 (GRCh37/hg19), 21,395 (GRCm38/mm10), and 19,996 (NCBI37/mm9) genes'  
276 canonical transcription start sites.

277 We also updated the ontology reference data. GREAT currently supports the most  
278 recent versions of the following ontologies at the time of analysis: Ensembl genes, Gene  
279 Ontology (GO)<sup>10,11</sup>, human phenotype ontology<sup>49</sup>, and mouse genome informatics (MGI)  
280 phenotype ontology<sup>12</sup> (**Supplementary Table S3**). The new Ensembl genes ontology is a  
281 “flat” ontology that makes every gene into a term, facilitating the testing of cis-regulatory  
282 elements congregation in the regulatory domains of individual genes. For MGI phenotype  
283 ontology, we mapped MGI gene identifiers to Ensembl human gene IDs using one-to-one  
284 orthology mappings from Ensembl Biomart<sup>48</sup> version 90. In total, we compiled 2,861,656,

285 2,846,384, 2,734,172, and 2,675,691 gene-term relationships for GRCh38, GRCh37,  
286 GRCm38, and NCBI37 genome assemblies, respectively ([Supplementary Table S3](#)).

## 287 **Computational TFBS prediction with PRISM**

288 To take advantage of growing sequence data from both multiple species and  
289 functional genomics datasets, we updated our computationally predicted PRISM conserved  
290 transcription factor binding sites (TFBSs) for the human (*Homo sapiens* GRCh38 and  
291 GRCh37) and mouse (*Mus musculus* GRCm38 and NCBI37) genomes. Briefly, PRISM  
292 predicts TFBSs based on evolutionary conservation of TF motif matches<sup>9</sup>. The GRCh37 and  
293 NCBI37 tracks are derived using liftOver<sup>50</sup> from that of GRCh38 and GRCm38,  
294 respectively.

295 We used the following multiple alignment from the UCSC genome browser<sup>50</sup>:

- 296 • Human GRCh38: Hg38 100-way conservation alignment (lastz)
- 297 • Mouse GRCm38: Mm10 60-way conservation alignment (lastz)

298 We removed Killer whale (*Orcinus orca*, orcOrc1) from the human alignment because of  
299 chromosome name mismatch. We further subset the alignments to Eutherian species<sup>9</sup>,  
300 resulting in 57 and 40 species for human and mouse, respectively. Using our manually  
301 curated TF monomer motif library<sup>51</sup>, we applied PRISM<sup>9</sup> with the default parameters and  
302 focused on the top 10,000 predicted TFBSs for each TF in our analyses. We used GNU  
303 parallel in our analysis<sup>52</sup>.

## 304 **Baseline TF enrichment method without functional annotation**

305 We computed the binomial p-value of each TFBS set, using the total number of  
306 TFBS predictions, the number intersecting the query and the fraction of the genome covered

307 by the open chromatin region. We ranked the TFs by their binomial fold ([Supplementary](#)  
308 [Table S1](#)).

### 309 [WhichTF analysis protocol](#)

310 WhichTF combines user specified accessibility measures, such as ATAC-seq or  
311 DNase-seq peaks with precomputed reference datasets to produce a ranked list of context  
312 specific, dominant TFs. The reference datasets consist of GREAT regulatory domain models,  
313 MGI mouse phenotype ontology-based gene annotations, and PRISM TFBS predictions.

314 WhichTF first identifies the top 100 ontology terms ( $\pi_1, \dots, \pi_{100}$ ) based on the  
315 GREAT enrichment test on the input query set with the default “basal plus extension”  
316 association rule and a filter that terms must be associated with no fewer than two genes and  
317 no more than 500 genes associated to them. For each TF in the PRISM TFBS prediction  
318 library of  $N$  TFs, WhichTF takes an intersection of the TFBS prediction track and the user  
319 submitted open regions using `overlapSelect`<sup>50</sup>.

320 Each TF in the PRISM library has a different number of TFBSs and regulatory  
321 domains of different total sizes associated with each term. To capture the relative  
322 importance of different TFs within different contexts, WhichTF computes a few measures of  
323 statistical significance for each transcription factor and term and summarizes these measures  
324 in TF by term summary statistic matrices. Specifically, we apply hypergeometric and  
325 binomial tests defined below:

## 326 TF hypergeometric test

327 Let's define the GREAT gene regulatory domain for term  $\pi_j$  as  $\text{RegDom}_j$ , PRISM  
328 TFBS prediction for  $\text{TF}_i$  as  $\text{TFBS}_i$ , and user's input query as QUERY. We define  $n_i$ ,  $k_{ij}$ ,  $N_i$ ,  
329 and  $K_{ij}$  as follows:

- 330 •  $n_i = \#\{\text{TFBS}_i \cap \text{QUERY}\}$
- 331 •  $k_{ij} = \#\{(\text{TFBS}_i \cap \text{QUERY}) \cap \text{RegDom}_j\}$
- 332 •  $N = \#\{(\cup_k \text{TFBS}_k) \cap \text{QUERY}\}$
- 333 •  $K_j = \#\{((\cup_k \text{TFBS}_k) \cap \text{QUERY}) \cap \text{RegDom}_j\}$

334 where,  $\cap$  denotes genomic intersection operation and  $\#\{G\}$  denotes a function to count the  
335 number of elements in genomic regions,  $G$ . With these parameters, we compute the  
336 hypergeometric p-value for each pair of  $\text{TF}_i$  and term  $\pi_j$ :

$$\sum_{k=k_{ij}}^{\min(n_i, K_j)} \frac{\binom{K_j}{k} \binom{N-K_j}{n_i-k}}{\binom{N}{n_i}}$$

337

## 338 TF binomial test

339 Using the intersection track,  $\text{TFBS}_i \cap \text{QUERY}$ , we compute the GREAT binomial p-  
340 value for each pair of  $\text{TF}_i$  and term  $\pi_j$ :

$$\sum_{k=k_{ij}}^{n_i} \binom{n_i}{k} p_{\pi_j}^k (1 - p_{\pi_j})^{n_i-k}$$

341

342 where,  $p_{\pi}$  denotes the probability of drawing a base annotated with term  $\pi$  from non-gap  
343 genomic sequences under the uniform distribution<sup>4</sup>.



## 344 **Adaptive TF significance threshold**

345 To eliminate false positives, WhichTF focuses on terms where the most significant  
346 TF characterized by both hypergeometric and binomial p-value match. Using the enrichment  
347 statistics, WhichTF selects dominant TFs for each selected ontology term. We compute the  
348 adaptive threshold for each of the hypergeometric and binomial test by finding a leap in the  
349 p-values of the top 10 TFs for each term using the following procedure. Let's denote the top  
350 10 hypergeometric p-values for a fixed functional term  $\pi$  as  $p_1 \leq p_2 \leq \dots \leq p_{10}$ . We  
351 define the difference of adjacent negative log of p-values as  $d_k = -\log \frac{p_k}{p_{k+1}}$ . We define  $m$ ,  
352 the index with the largest leap in p-value as  $m = \operatorname{argmax}_k d_k$ . Our adaptive threshold is  $p_m$   
353 and we only keep TFs with hypergeometric p-values that satisfies  $p \leq p_m$ . We define the  
354 adaptive threshold for binomial p-values in the same way. We say  $\text{TF}_i$  is significant for term  
355  $\pi_j$  when it passes the adaptive thresholds for both TF hypergeometric and TF binomial tests.

## 356 **WhichTF scores**

357 For each TF, WhichTF computes the score by the following equation. Let  $(\pi_1, \dots, \pi_K)$  be the  
358 set of terms selected from step 1 in the order of relevance with  $\pi_1$  as the top hit. Let  
359  $\text{Rank}(\text{TF}_i, \pi_j)$  be the rank of the  $\text{TF}_i$  for term  $\pi_j$ . Let  $\text{Significant}(\text{TF}_i, \pi_j)$  denote a Boolean  
360 variable that indicates whether  $\text{TF}_i$  passes the filters described above for term  $\pi_j$  (i.e.  
361 Significant is 1 if the TF passes the significance filter and zero otherwise). With this  
362 notation, we define the WhichTF score of  $\text{TF}_i$  as:

$$363 \quad \text{WhichTF score}(\text{TF}_i) = \sum_j \frac{\text{Significant}(\text{TF}_i, \pi_j)}{\sqrt{j \cdot \text{Rank}(\text{TF}_i, \pi_j)}}.$$

## 364 WhichTF conditional p-values

365 WhichTF computes the statistical significance of a WhichTF score based on a null model  
366 that any ordering of TFs within each term is equally likely. Thus, the probability of a given  
367 score is determined by the relative number of configurations with the score. To enumerate  
368 the number of configurations with a given score in polynomial time, we devised a dynamic  
369 programming approach<sup>53</sup> which acts recursively on the number of functional terms,  $K$ . This  
370 procedure first discretizes each contribution to the summand in the definition of the  
371 WhichTF score defined above. Let  $\{s_{j1}, s_{j2}, \dots, s_{jM_j}\}$  be the set of all the possible cumulative  
372 scores up to term  $\pi_j$ , that is the scores gotten by computing the above sum only up to  
373 term  $\pi_j$ . Here,  $M_j$  is the number of distinct discretized scores up to term  $\pi_j$ . Let  $n_{ji}$  represent  
374 the number of different ways of getting each such score,  $s_{ji}$ , and let  $S_j = \{(s_{j1}, n_{j1}), (s_{j2},$   
375  $n_{j2}), \dots, (s_{jM_j}, n_{jM_j})\}$  be the set of all tuples of scores and number of configurations. Finally,  
376 let  $\{t_{j1}, t_{j2}, \dots, t_{jM_j}\}$  denote the individual summands at term  $\pi_j$ .

377 The p-value of each score is computed directly from  $S_K$ , the full set of cumulative  
378 scores and number of configurations, by dividing the number of configurations with scores  
379 greater than or equal to a given score by the total number of configurations. This list of  
380 tuples,  $S_j$ , can be computed recursively with the base case of  $S_0 = \{(0, 1)\}$ . The set of scores  
381 at level  $j+1$  is given by all combinations,  $s_{ji} + t_{j+1k}$ , with the number of configurations  
382 given by aggregating over all combinations of  $s$  and  $t$  that yield the same cumulative score.

383 Given that the WhichTF scores of multiple TFs are not independent, we apply the  
384 procedure defined above from the top scoring TF to the TF with the lowest score and  
385 compute conditional statistical significance. This means that for the computation of

386 statistical significance of the  $i$ -th ranking TF, we remove TFs whose rank is smaller than  $i$   
387 and apply the recursive procedure defined above.

## 388 **Application of WhichTF in diverse functional contexts**

### 389 **Multiple cell types from the ENCODE/Roadmap project**

390 From the ENCODE/Roadmap data portal, we obtained “hotspot” files derived from DNase-  
391 seq experiments<sup>54,55</sup>. All coordinates are provided in GRCh37. We present analysis spanning  
392 95 samples from 12 cell types and tissues (**Supplementary Table S4**).

393 We systematically applied WhichTF to each sample and obtained the ranked list of  
394 TFs as well as a vector of WhichTF scores across all TFs in the library (**Figure 2a, Table 2**).  
395 We applied t-SNE, a non-linear dimension reduction method<sup>18</sup>, implemented in Python  
396 Scikit Learn library<sup>56</sup> with perplexity 10 (**Figure 2b**).

397 Using mouse ENCODE DNase-seq datasets provided in GRCm38 from the four cell  
398 types used for the human analysis (**Figure 2a, Supplementary Table S5**), we applied  
399 WhichTF using mouse GRCm38 reference dataset (**Supplementary Table S2**).

### 400 **Cell type-specific expression analysis**

401 We presented cell type-specific RNA-seq data from the GEO database (GSE118165)<sup>23</sup>. We  
402 subsetted this dataset to the unstimulated samples and plotted the expression of *SPIB* and  
403 *RUNX3* for lymphoid cells in T and B cell lineages (**Figure 3a**).

### 404 **WhichTF for differential analysis**

405 To find TFs dominant in an input set A compared to another input set B, we defined  
406 set A and set B regions as foreground and background, respectively. We used bedtools<sup>57</sup>

407 “subtract” to keep a subset of A that does not overlap with B. We applied WhichTF single  
408 run mode (above) on the identified differentially accessible regions (**Figure 3b**).

#### 409 **Mesoderm lineage dataset**

410 Using ATAC-seq datasets (SRP073808 from NCBI GEO database) of mesoderm  
411 development<sup>24</sup> (**Supplementary Table S6**), we applied WhichTF differential analysis  
412 following the diagram of sequential differentiation (**Figure 4**).

#### 413 **Systemic lupus erythematosus dataset**

414 Eight sets (4 SLE and 4 healthy controls [HC]) were taken from the NCBI sequence read  
415 archive (SRA, **Supplementary Table S7**). Paired end reads were mapped using bowtie2  
416 with the outer distance flag (-X) set to 1000 and otherwise default settings<sup>58</sup>. Samtools was  
417 used to generate a sorted bam file and MACS2 was used to call peaks with shift set to 37,  
418 extension size set to 72 and broad and keep-dup flags on<sup>59,60</sup>. Given that some of the  
419 samples in this dataset are from a biobank, we conservatively defined differentially  
420 accessible regions shown below and applied WhichTF differential analysis (**Table 1**):

- 421 • SLE – HC :=  $SRR3158183 - \bigcup_{x \in SRR3158176-9} x$
- 422 • HC – SLE :=  $\bigcap_{x \in SRR3158176-9} x - \bigcup_{x \in SRR3158180-3} x$

#### 423 **Tissue-specific gene expression of the identified TF**

424 Using the data obtained from the GTEx Portal<sup>61</sup> on 05/24/2019 (phs000424.v7.p2), we  
425 investigated whether the identified TFs in have a tissue-specific expression  
426 (**Supplementary Figure S1**).

## 427 **Data availability**

428 All datasets analyzed in this study are publicly available through the ENCODE/Roadmap  
429 portal [<https://www.encodeproject.org/>], NCBI GEO database  
430 [<https://www.ncbi.nlm.nih.gov/geo/>], NCBI sequence read archive [NCBI sequence read  
431 archive], or the GTEx Portal [<https://gtexportal.org>] with identifiers included in  
432 Supplementary Tables S4-S7 and in Online Methods.

## 433 **Code availability**

434 WhichTF program and analysis scripts are available at our Bitbucket repository:  
435 <https://bitbucket.org/bejerano/whichtf>  
436 GREAT version 4.0.4: <https://great.stanford.edu>

## 437 **References**

- 438 1. Lambert, S. A. *et al.* The Human Transcription Factors. *Cell* **172**, 650–665 (2018).
- 439 2. Lee, T. I. & Young, R. A. Transcriptional Regulation and Its Misregulation in Disease.  
440 *Cell* **152**, 1237–1251 (2013).
- 441 3. Johnson, D. S., Mortazavi, A., Myers, R. M. & Wold, B. Genome-wide mapping of in  
442 vivo protein-DNA interactions. *Science* **316**, 1497–1502 (2007).
- 443 4. McLean, C. Y. *et al.* GREAT improves functional interpretation of cis-regulatory  
444 regions. *Nat. Biotechnol.* **28**, 495–501 (2010).
- 445 5. Rosenfeld, M. G. Sensors and signals: a coactivator/corepressor/epigenetic code for  
446 integrating signal-dependent programs of transcriptional response. *Genes Dev.* **20**,  
447 1405–1428 (2006).

- 448 6. Thurman, R. E. *et al.* The accessible chromatin landscape of the human genome.  
449 *Nature* **489**, 75–82 (2012).
- 450 7. Buenrostro, J. D., Giresi, P. G., Zaba, L. C., Chang, H. Y. & Greenleaf, W. J. Transposition  
451 of native chromatin for fast and sensitive epigenomic profiling of open chromatin,  
452 DNA-binding proteins and nucleosome position. *Nat. Methods* **10**, 1213–1218  
453 (2013).
- 454 8. Buenrostro, J. D. *et al.* Single-cell chromatin accessibility reveals principles of  
455 regulatory variation. *Nature* **523**, 486–490 (2015).
- 456 9. Wenger, A. M. *et al.* PRISM offers a comprehensive genomic approach to  
457 transcription factor function prediction. *Genome Res.* **23**, 889–904 (2013).
- 458 10. Ashburner, M. *et al.* Gene ontology: tool for the unification of biology. The Gene  
459 Ontology Consortium. *Nat. Genet.* **25**, 25–29 (2000).
- 460 11. The Gene Ontology Consortium. Expansion of the Gene Ontology  
461 knowledgebase and resources. *Nucleic Acids Res.* **45**, D331–D338 (2017).
- 462 12. Smith, C. L. & Eppig, J. T. Expanding the mammalian phenotype ontology to  
463 support automated exchange of high throughput mouse phenotyping data generated  
464 by large-scale mouse knockout screens. *J. Biomed. Semant.* **6**, 11 (2015).
- 465 13. Gerondakis, S. & Siebenlist, U. Roles of the NF- $\kappa$ B Pathway in Lymphocyte  
466 Development and Function. *Cold Spring Harb. Perspect. Biol.* **2**, a000182 (2010).
- 467 14. Pikkarainen, S., Tokola, H., Kerkelä, R. & Ruskoaho, H. GATA transcription  
468 factors in the developing and adult heart. *Cardiovasc. Res.* **63**, 196–207 (2004).

- 469 15. Takahashi, K. & Yamanaka, S. Induction of Pluripotent Stem Cells from Mouse  
470 Embryonic and Adult Fibroblast Cultures by Defined Factors. *Cell* **126**, 663–676  
471 (2006).
- 472 16. Thiel, G. *Transcription Factors in the Nervous System: Development, Brain*  
473 *Function, and Diseases*. (John Wiley & Sons, 2006).
- 474 17. Hodge, R. D. & Hevner, R. F. Expression and actions of transcription factors in  
475 adult hippocampal neurogenesis. *Dev. Neurobiol.* **71**, 680–689 (2011).
- 476 18. Maaten, L. V. D. & Hinton, G. Visualizing Data using t-SNE. *J. Mach. Learn. Res.* **9**,  
477 2579–2605 (2008).
- 478 19. DeKoter, R. P. *et al.* Regulation of Follicular B Cell Differentiation by the Related  
479 E26 Transformation-Specific Transcription Factors PU.1, Spi-B, and Spi-C. *J.*  
480 *Immunol.* 1001413 (2010). doi:10.4049/jimmunol.1001413
- 481 20. Sokalski, K. M. *et al.* Deletion of genes encoding PU.1 and Spi-B in B cells impairs  
482 differentiation and induces pre-B cell acute lymphoblastic leukemia. *Blood* blood-  
483 2011-02-335539 (2011). doi:10.1182/blood-2011-02-335539
- 484 21. Willis, S. N. *et al.* Environmental sensing by mature B cells is controlled by the  
485 transcription factors PU.1 and SpiB. *Nat. Commun.* **8**, 1426 (2017).
- 486 22. Woolf, E. *et al.* Runx3 and Runx1 are required for CD8 T cell development  
487 during thymopoiesis. *Proc. Natl. Acad. Sci. U. S. A.* **100**, 7731–7736 (2003).
- 488 23. Calderon, D. *et al.* Landscape of stimulation-responsive chromatin across  
489 diverse human immune cells. *bioRxiv* 409722 (2018). doi:10.1101/409722
- 490 24. Loh, K. M. *et al.* Mapping the Pairwise Choices Leading from Pluripotency to  
491 Human Bone, Heart, and Other Mesoderm Cell Types. *Cell* **166**, 451–467 (2016).

- 492 25. Papaioannou, V. E. The T-box gene family: emerging roles in development, stem  
493 cells and cancer. *Development* **141**, 3819–3833 (2014).
- 494 26. Weidgang, C. E. *et al.* TBX3 Directs Cell-Fate Decision toward Mesendoderm.  
495 *Stem Cell Rep.* **1**, 248–265 (2013).
- 496 27. Denans, N., Iimura, T. & Pourquié, O. Hox genes control vertebrate body  
497 elongation by collinear Wnt repression. *eLife* (2015). doi:10.7554/eLife.04379
- 498 28. Machon, O., Masek, J., Machonova, O., Krauss, S. & Kozmik, Z. Meis2 is essential  
499 for cranial and cardiac neural crest development. *BMC Dev. Biol.* **15**, 40 (2015).
- 500 29. Inoue, T., Ota, M., Mikoshiba, K. & Aruga, J. Zic2 and Zic3 synergistically control  
501 neurulation and segmentation of paraxial mesoderm in mouse embryo. *Dev. Biol.*  
502 **306**, 669–684 (2007).
- 503 30. Rojas, A. *et al.* Gata4 expression in lateral mesoderm is downstream of BMP4  
504 and is activated directly by Forkhead and GATA transcription factors through a  
505 distal enhancer element. *Development* **132**, 3405–3417 (2005).
- 506 31. Park, B.-Y. & Saint-Jeannet, J.-P. Expression analysis of Runx3 and other Runx  
507 family members during *Xenopus* development. *Gene Expr. Patterns GEP* **10**, 159–166  
508 (2010).
- 509 32. Kalev-Zylinska, M. L. *et al.* Runx3 is required for hematopoietic development in  
510 zebrafish. *Dev. Dyn.* **228**, 323–336 (2003).
- 511 33. Tsiairis, C. D. & McMahon, A. P. A Hh-dependent Pathway in Lateral Plate  
512 Mesoderm Enables The Generation Of Left-Right Asymmetry. *Curr. Biol. CB* **19**,  
513 1912–1917 (2009).



- 514 34. Jahangiri, L. *et al.* The AP-1 transcription factor component Fosl2 potentiates  
515 the rate of myocardial differentiation from the zebrafish second heart field. *Dev.*  
516 *Camb. Engl.* **143**, 113–122 (2016).
- 517 35. Dyer, L. A. & Kirby, M. L. Sonic hedgehog maintains proliferation in secondary  
518 heart field progenitors and is required for normal arterial pole formation. *Dev. Biol.*  
519 **330**, 305–317 (2009).
- 520 36. Tsokos, G. C. Systemic Lupus Erythematosus. *N. Engl. J. Med.* **365**, 2110–2121  
521 (2011).
- 522 37. Scharer, C. D. *et al.* ATAC-seq on biobanked specimens defines a unique  
523 chromatin accessibility structure in naïve SLE B cells. *Sci. Rep.* **6**, 27030 (2016).
- 524 38. Fujikura, D. *et al.* Death receptor 6 contributes to autoimmunity in lupus-prone  
525 mice. *Nat. Commun.* **8**, 13957 (2017).
- 526 39. Qin, S. *et al.* The Effect of SHH-Gli Signaling Pathway on the Synovial Fibroblast  
527 Proliferation in Rheumatoid Arthritis. *Inflammation* **39**, 503–512 (2016).
- 528 40. Bakhtadze, E. *et al.* Common variants in the TCF7L2 gene help to differentiate  
529 autoimmune from non-autoimmune diabetes in young (15–34 years) but not in  
530 middle-aged (40–59 years) diabetic patients. *Diabetologia* **51**, 2224–2232 (2008).
- 531 41. Stridh, P. *et al.* Fine-Mapping Resolves Eae23 into Two QTLs and Implicates  
532 ZEB1 as a Candidate Gene Regulating Experimental Neuroinflammation in Rat. *PLOS*  
533 *ONE* **5**, e12716 (2010).
- 534 42. van den Brink, S. C. *et al.* Single-cell sequencing reveals dissociation-induced  
535 gene expression in tissue subpopulations. *Nat. Methods* **14**, 935–936 (2017).

- 536 43. Van Esch, H. & Bilous, R. W. GATA3 and kidney development: why case reports  
537 are still important. *Nephrol. Dial. Transplant.* **16**, 2130–2132 (2001).
- 538 44. Kreidberg, J. A. WT1 and kidney progenitor cells. *Organogenesis* **6**, 61–70  
539 (2010).
- 540 45. Park, C., Kim, T. M. & Malik, A. B. Transcriptional regulation of endothelial cell  
541 and vascular development. *Circ. Res.* **112**, 1380–1400 (2013).
- 542 46. Eckert, R. L. *et al.* AP1 transcription factors in epidermal differentiation and skin  
543 cancer. *J. Skin Cancer* **2013**, 537028 (2013).
- 544 47. Regev, A. *et al.* The Human Cell Atlas. *eLife* **6**, e27041 (2017).
- 545 48. Zerbino, D. R. *et al.* Ensembl 2018. *Nucleic Acids Res.* **46**, D754–D761 (2018).
- 546 49. Köhler, S. *et al.* Expansion of the Human Phenotype Ontology (HPO) knowledge  
547 base and resources. *Nucleic Acids Res.* (2018). doi:10.1093/nar/gky1105
- 548 50. Kent, W. J. *et al.* The human genome browser at UCSC. *Genome Res.* **12**, 996–  
549 1006 (2002).
- 550 51. Guturu, H., Doxey, A. C., Wenger, A. M. & Bejerano, G. Structure-aided prediction  
551 of mammalian transcription factor complexes in conserved non-coding elements.  
552 *Philos. Trans. R. Soc. Lond. B. Biol. Sci.* **368**, 20130029 (2013).
- 553 52. Tange, O. GNU Parallel - The Command-Line Power Tool. *Login USENIX Mag.* **36**,  
554 42–47 (2011).
- 555 53. Cormen, T. H., Leiserson, C. E., Rivest, R. L. & Stein, C. *Introduction to Algorithms*,  
556 *3rd Edition.* (The MIT Press, 2009).
- 557 54. ENCODE Project Consortium. An integrated encyclopedia of DNA elements in  
558 the human genome. *Nature* **489**, 57–74 (2012).

- 559 55. Roadmap Epigenomics Consortium *et al.* Integrative analysis of 111 reference  
560 human epigenomes. *Nature* **518**, 317–330 (2015).
- 561 56. Pedregosa, F. *et al.* Scikit-learn: machine learning in python. *J Mach Learn Res*  
562 **12**, 2825–2830 (2011).
- 563 57. Quinlan, A. R. & Hall, I. M. BEDTools: a flexible suite of utilities for comparing  
564 genomic features. *Bioinformatics* **26**, 841–842 (2010).
- 565 58. Langmead, B. & Salzberg, S. L. Fast gapped-read alignment with Bowtie 2. *Nat.*  
566 *Methods* **9**, 357–359 (2012).
- 567 59. Li, H. *et al.* The Sequence Alignment/Map format and SAMtools. *Bioinforma. Oxf.*  
568 *Engl.* **25**, 2078–2079 (2009).
- 569 60. Zhang, Y. *et al.* Model-based Analysis of ChIP-Seq (MACS). *Genome Biol.* **9**, R137  
570 (2008).
- 571 61. Li, X. *et al.* The impact of rare variation on gene expression across tissues.  
572 *Nature* **550**, 239–243 (2017).
- 573

## 574 Acknowledgements

575 We thank Stanford's Kyle M. Loh, as well as Heidi Chen, Alex M. Tseng, and other  
576 members of the Bejerano Lab for useful discussions, feedback and advice. Y.T. is supported  
577 by a Funai Overseas Scholarship from the Funai Foundation for Information Technology  
578 and the Stanford University School of Medicine. E.S.D. was supported in part by the  
579 Simons Collaboration Grant on the Non-Perturbative Bootstrap. This work was supported  
580 by National Institute of Mental Health (NIMH) of the National Institutes of Health (NIH)  
581 under awards U01MH105949 to G.B. The content is solely the responsibility of the authors  
582 and does not necessarily represent the official views of the National Institutes of Health.

## 583 Author information

### 584 Author contributions

585 E.S.D., Y.T. and G.B. conceived and designed the study. Y.T. updated GREAT. E.S.D.  
586 conceived of and developed the WhichTF algorithm with support from Y.T. and G.B. E.S.D.  
587 and Y.T. performed the computational analyses. Y.T. led the completion of the manuscript  
588 with support from E.S.D. and oversight from G.B. Y.T. and E.S.D. contributed equally to  
589 the project and author list is ordered by age. The manuscript was written and approved by all  
590 authors.

### 591 Competing interests

592 The authors declare no competing interests.

593

594 **Figures and Tables**

595 **Figure 1**

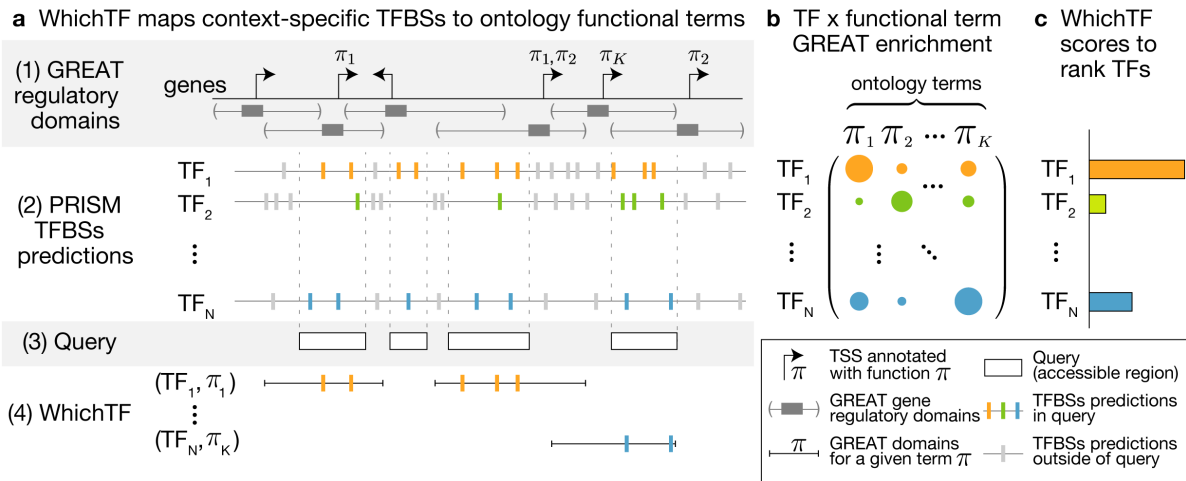

596

597 **Fig. 1** WhichTF identifies dominant TFs for given experimental measurements of chromatin

598 accessibility. (a) WhichTF uses gene regulatory domain models and ontologies from the

599 genomic region enrichment analysis tool (GREAT) (step 1) and conservation-based PRISM

600 predictions of TFBSs (step 2). Given a user-defined set of genomic regions (step 3),

601 WhichTF considers the top- $K$  GREAT functional terms ( $\pi_1, \dots, \pi_K$ ) enriched in the query

602 regions. For all pairwise combinations of top- $K$  term and TF, WhichTF counts the number

603 of TFBSs within the specified query regions (step 4). (b) The binomial and hypergeometric

604 TFBS enrichment  $p$ -values for each ontology term are compiled in a TF-by-term summary

605 statistic matrix. (c) Aggregating the summary statistics over terms, WhichTF returns a

606 ranked list of TFs, ordered by predicted functional importance in the user-specific chromatin

607 environment, with the corresponding scores and statistics (Online Methods). TSS,

608 transcription start site.

609 **Figure 2**

610 **a**

| B cells (ENCFF719GOE) |          |            |           |          | T cells (ENCFF861OSQ) |          |            |          |
|-----------------------|----------|------------|-----------|----------|-----------------------|----------|------------|----------|
| TF                    | -log(CP) | Importance | PMID      |          | TF                    | -log(CP) | Importance | PMID     |
| 1                     | SPIB     | 76.0       | Confirmed | 21057087 | NFKB1                 | 96.8     | Confirmed  | 20452952 |
| 2                     | NFKB1    | 89.6       | Confirmed | 20452952 | RUNX3                 | 89.2     | Confirmed  | 12796513 |
| 3                     | RELB     | 62.1       | Confirmed | 20452952 | RELB                  | 63.5     | Confirmed  | 20452952 |
| 4                     | RELA     | 32.1       | Confirmed | 20452952 | RELA                  | 43.0     | Confirmed  | 20452952 |
| 5                     | SPIC     | 11.5       | Confirmed | 21057087 | REL                   | 15.5     | Confirmed  | 20452952 |
| Heart (ENCFF176HSL)   |          |            |           |          | Brain (ENCFF318HIS)   |          |            |          |
| TF                    | -log(CP) | Importance | PMID      |          | TF                    | -log(CP) | Importance | PMID     |
| 1                     | GATA5    | 50.5       | Confirmed | 16987437 | SOX2                  | 69.4     | Confirmed  | 28733588 |
| 2                     | GATA4    | 19.5       | Confirmed | 16987437 | OTX1                  | 12.5     | Confirmed  | 20354145 |
| 3                     | GATA6    | 18.3       | Confirmed | 28178271 | GLI1                  | 16.8     | Confirmed  | 14581620 |
| 4                     | TEAD4    | 10.8       | Confirmed | 16987437 | GLI2                  | 7.9      | Confirmed  | 14581620 |
| 5                     | FOS      | 12.1       | Confirmed | 16934006 | ISL1                  | 6.8      | Confirmed  | 24763339 |

611 **b**

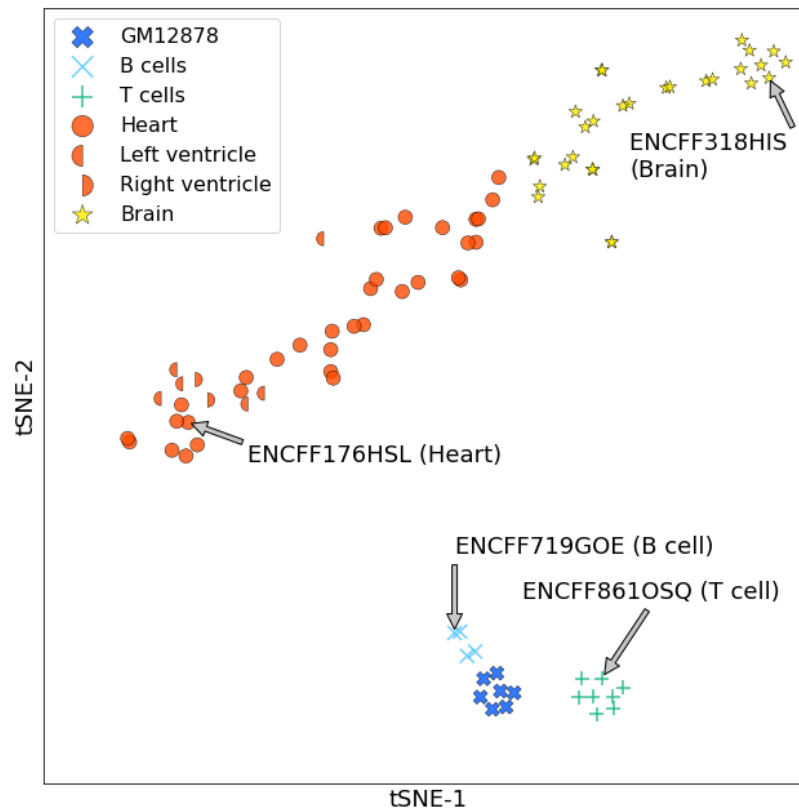

612

613 **Fig. 2** Which TF identifies dominant TFs in diverse cell types. (a) The top 5 identified

614 dominant TFs for B-, T-, heart, and brain cells are shown with the corresponding negative

615 log conditional probability ( $-\log CP$ ), a statistical significance of the score of each TF,  
616 conditioned on the TFs with higher score (Online Methods). The importance and PubMed  
617 ID (PMID) columns indicate whether existing literature supports the role of the identified  
618 TFs, typically through perturbation experiments. (b) For DNase-seq data tracks of 90  
619 samples across 7 cell types, the WhichTF score vectors are projected to t-SNE plot.  
620 WhichTF quantitatively and robustly captures biological similarities and dissimilarities of  
621 TF-mediated transcriptional programs. The samples highlighted in (a) are annotated with  
622 arrows.  
623

624 **Figure 3**

625 **a**

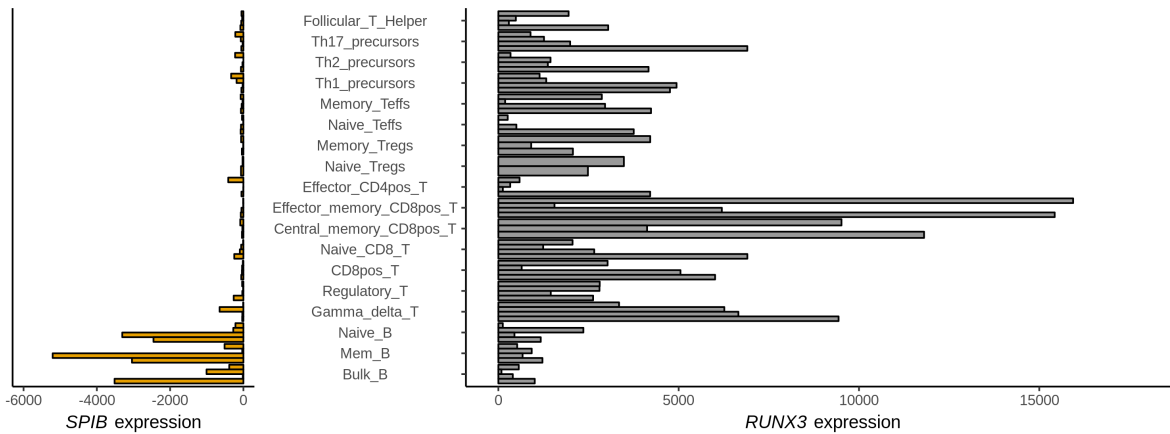

626

627

**b**

| B cells – T cells |          |            |           | T cells – B cells |          |            |           |          |
|-------------------|----------|------------|-----------|-------------------|----------|------------|-----------|----------|
| TF                | -log(CP) | Importance | PMID      | TF                | -log(CP) | Importance | PMID      |          |
| 1                 | SPIB     | 28.4       | Confirmed | 21057087          | RUNX3    | 171.1      | Confirmed | 12796513 |
| 2                 | SPI1     | 21.4       | Confirmed | 21057087          | NFKB1    | 47.7       | Confirmed | 20452952 |
| 3                 | SPIC     | 17.1       | Confirmed | 21057087          | RUNX1    | 36.5       | Confirmed | 12796513 |
| 4                 | REL      | 4.3        | Confirmed | 20452952          | REL      | 8.0        | Confirmed | 20452952 |
| 5                 | RELB     | 2.8        | Confirmed | 20452952          | CBFB     | 9.1        | Confirmed | 17185462 |

628

629 **Fig. 3** Which TF identifies differentially dominant TFs in B and T-cell DNase-seq data. (a)

630 Gene expression of the top differential TF genes, *SPI-B* and *RUNX3*, are shown (horizontal

631 axis) across diverse lymphoid cell types (vertical axis) for up to four healthy donors. (b) The

632 top 5 differential TFs for B-cells relative to T-cells (B-cell – T-cell) and vice versa (T-cell –

633 B-cell) are shown with the corresponding statistical significance, negative log conditional

634 probabilities (-log CP). The importance and PubMed ID (PMID) columns indicate whether

635 existing literature supports the identified TFs.

636



637 **Figure 4**

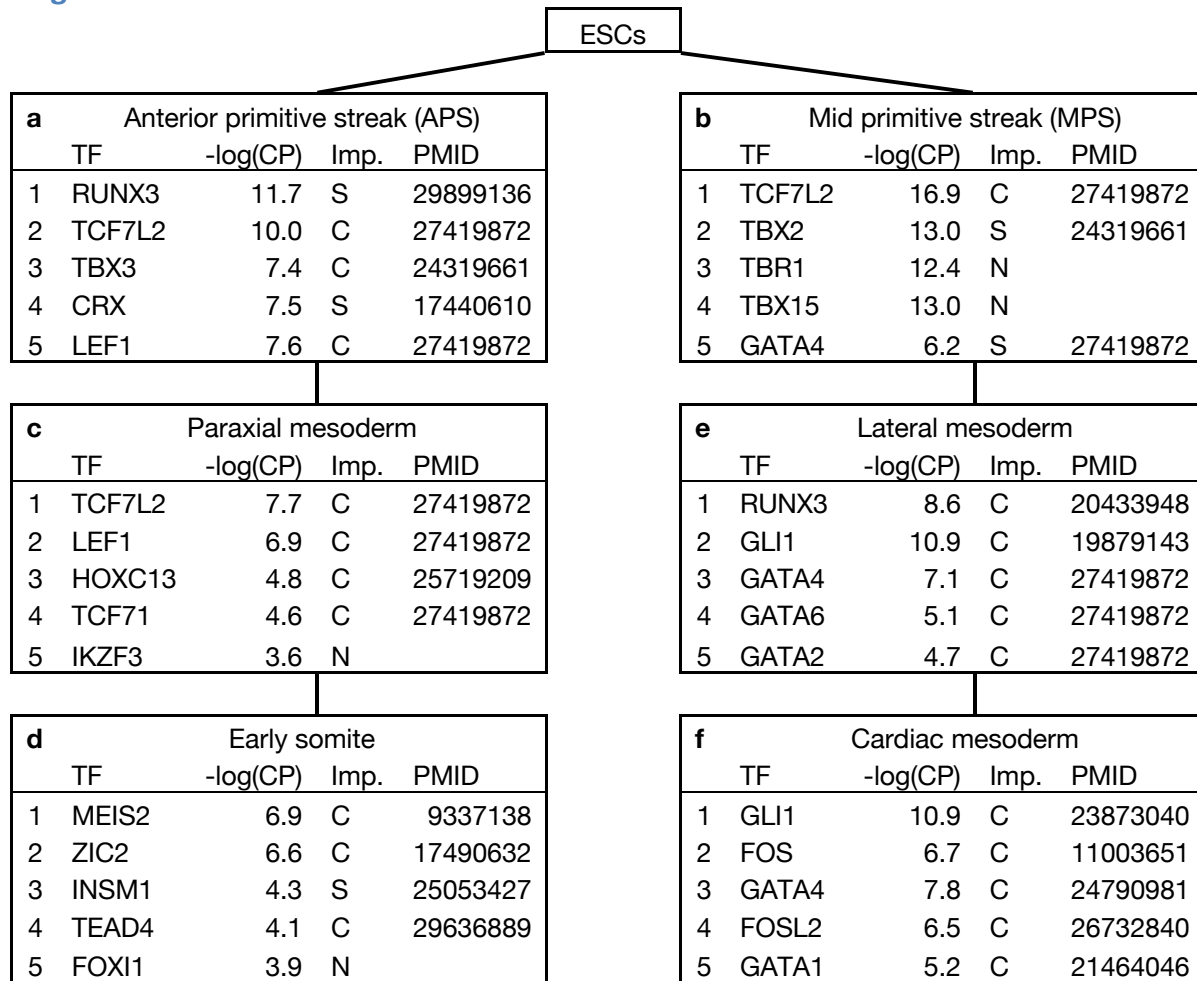

638

639 **Fig. 4** Which TF identifies differentially dominant TFs compared to immediate progenitor  
 640 cells along human mesoderm development pathway from ATAC-seq data. The top 5 TFs  
 641 with the corresponding statistical significance, negative log conditional probabilities (-log  
 642 CP) are shown. The importance (Imp.) and PubMed ID (PMID) columns indicate whether  
 643 (i) existing literature supports the identified TFs (C: confirmed); (ii) literature reports  
 644 closely related factors, such as co-factors and functionally related family members, or the  
 645 identified TFs in related context (S: suggestive); or (iii) novel (N). ESCs, embryonic stem  
 646 cells.

647 **Table 1: WhichTF identifies disease relevant TFs**

| HC - SLE  |          |      |          | SLE - HC |          |      |          |
|-----------|----------|------|----------|----------|----------|------|----------|
| TF        | -log(CP) | Imp. | PMID     | TF       | -log(CP) | Imp. | PMID     |
| 1 BCL6    | 28.7     | C    | 28045014 | GLI1     | 19.7     | S    | 26552406 |
| 2 TFAP2B  | 19.3     | N    |          | ZFP143   | 11.0     | N    |          |
| 3 ZEB1    | 16.6     | S    | 20856809 | TCF7L2   | 6.0      | S    | 18839133 |
| 4 ZSCAN21 | 15.2     | N    |          | ONECUT2  | 5.2      | S    | 28317889 |
| 5 ZSCAN20 | 14.2     | N    |          | DMRTC2   | 3.8      | N    |          |

648

649 **Table 1** WhichTF identifies differentially dominant TFs from ATAC-seq measurement of  
650 B-cells from systemic lupus erythematosus (SLE) patients and healthy controls ( HC). The  
651 top 5 TFs based on the analysis of HC with respect to SLE (HC - SLE) and vice versa (SLE  
652 - HC) are shown with the corresponding statistical significance, negative log conditional  
653 probabilities (-log CP). The importance (Imp.) and PubMed ID (PMID) columns indicate  
654 whether literature supports the identified TFs: confirmed (C), suggestive (S), or novel (N).

655

656 **Table 2: WhichTF identifies stress response factors in different samples**

|    | B-cell<br>ENCFF719GOE |     | Keratinocyte<br>ENCFF047IIB |     | Adrenal Gland<br>ENCFF212TPU |   | Lymphatic Vessel<br>Endothelium<br>ENCFF354CZP |   | Pulmonary Artery<br>Endothelium<br>ENCFF596PRJ |   | Dermis Vessel<br>Endothelium<br>ENCFF908DMH |   |
|----|-----------------------|-----|-----------------------------|-----|------------------------------|---|------------------------------------------------|---|------------------------------------------------|---|---------------------------------------------|---|
| 1  | SPIB                  | *   | FOSB                        | * + | ZFP410                       |   | NFKB1                                          | + | FOSL1                                          | + | NFKB1                                       | + |
| 2  | NFKB1                 | * + | FOS                         | * + | FOS                          | + | FOS                                            | + | FOS                                            | + | FOS                                         | + |
| 3  | RELB                  | * + | FOSL1                       | * + | FOSL1                        | + | FOSL1                                          | + | FOSL2                                          | + | FOSL1                                       | + |
| 4  | RELA                  | * + | JUND                        | * + | NFKB1                        | + | RELB                                           | + | NFKB1                                          | + | RELA                                        | + |
| 5  | SPIC                  | *   | BATF                        | +   | JUNB                         | + | BATF                                           | + | JUND                                           | + | FOSL2                                       | + |
| 6  | SPI1                  | *   | FOSL2                       | * + | FOSL2                        | + | JUND                                           | + | RELB                                           | + | BATF                                        | + |
| 7  | ZFP410                |     | BACH2                       | +   | BACH1                        | + | FOSL2                                          | + | BATF                                           | + | FOSB                                        | + |
| 8  | RUNX3                 |     | JUNB                        | * + | JUND                         | + | REL                                            | + | RELA                                           | + | RELB                                        | + |
| 9  | REL                   | * + | BACH1                       | +   | RELB                         | + | RELA                                           | + | SOX10                                          | * | JUND                                        | + |
| 10 | STAT2                 | *   | JUN                         | * + | BACH2                        | + | SPIC                                           | * | FOSB                                           | + | SOX7                                        | * |
| 11 | WT1                   |     | NFE2L2                      |     | GATA3                        | * | FOSB                                           | + | BACH2                                          | + | ZFP410                                      |   |
| 12 | SNAI3                 |     | NFKB1                       | +   | JUN                          | + | ZFP410                                         |   | BACH1                                          | + | BACH1                                       | + |
| 13 | ZEB2                  | *   | MZF1                        |     | WT1                          | * | SPIB                                           | * | GATA4                                          | * | GATA4                                       | * |
| 14 | ATF6                  |     | RELB                        | +   | BATF                         | + | SOX30                                          | * | JUNB                                           | * | SOX12                                       | * |
| 15 | E2F5                  | *   | ZFP217                      |     | NFE2L2                       |   | SOX7                                           | * | GATA5                                          | * | FOXD1                                       | * |
| 16 | IKZF3                 | *   | ETS2                        | *   | GATA6                        | * | SOX18                                          | * | SOX30                                          | * | SOX30                                       | * |
| 17 | ELF5                  |     | PITX1                       |     | FOSB                         | + | JUNB                                           | + | SPIB                                           | * | SOX30                                       | * |
| 18 | SP100                 |     | ATF6                        |     | GATA4                        | * | SOX12                                          | * | SOX18                                          | * | SOX18                                       | * |
| 19 | IRF9                  | *   | TFCP2L1                     |     | MITF                         | * | BACH1                                          | + | JUN                                            | * | FOXO6                                       | * |
| 20 | SNAI1                 |     | MYC                         | *   | FOXP2                        | * | FOXO3                                          | * | FOXO3                                          | * | FOXO4                                       | * |

657

658 **Table 2** WhichTF identifies TFs known for stress response. The top 20 TFs identified by

659 WhichTF are shown in ranked order for B-cells, keratinocytes, adrenal gland, lymphatic

660 vessel endothelium, pulmonary artery endothelium, and dermis vessel endothelium cells.

661 The TFs known to be involved in stress response signals are marked with plus (+), while

662 TFs in families known to be functionally important in each context are marked with asterisk

663 (\*).

664

## 665 **Supplementary materials**

### 666 **List of supplementary materials**

#### 667 **Supplementary Figures**

- 668 • Supplementary Figure S1: Gene expression profile of *TBX15*

#### 669 **Supplementary tables**

- 670 • Supplementary Table S1: Baseline TF enrichment method
- 671 • Supplementary Table S2: Mouse ENCODE dataset analysis
- 672 • Supplementary Table S3: The update summary of GREAT ontologies
- 673 • Supplementary Table S4: Human ENCODE datasets
- 674 • Supplementary Table S5: Mouse ENCODE datasets
- 675 • Supplementary Table S6: Mesoderm development samples
- 676 • Supplementary Table S7: Sequence read archive accession IDs for systemic
- 677 lupus erythematosus dataset

678

## 679 Supplementary Figures

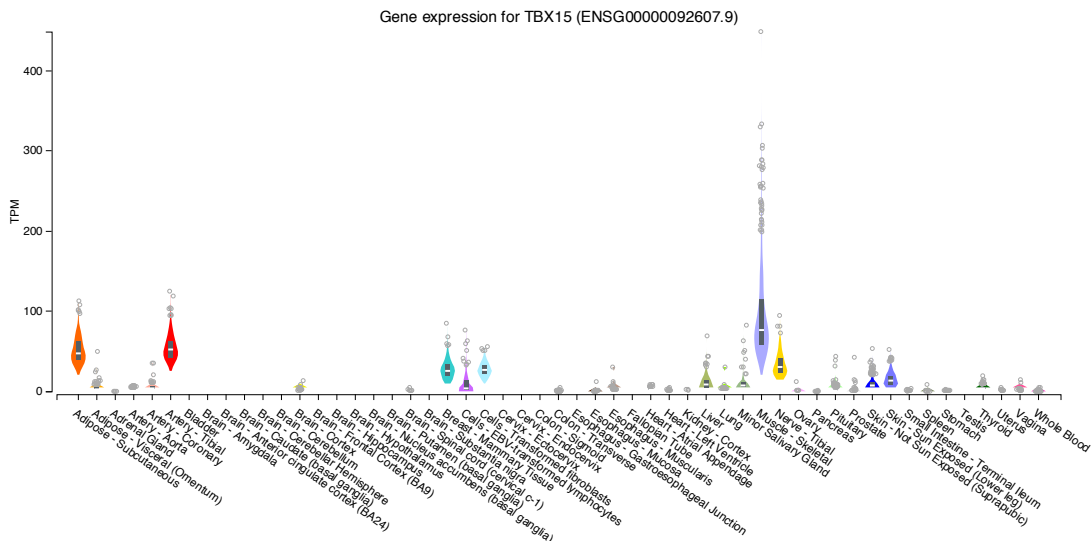

680  
681 **Supplementary Figure S1.** Tissue-specific gene expression profile of *TBX15* in muscle.  
682 The Human cell types are shown on x-axis and the expression (TPM) is shown on y-axis.  
683 The median and 25th and 75th percentiles are shown as box plots and data points are shown  
684 as outliers if they are above or below 1.5 times the interquartile range.  
685

## 686 Supplementary Tables

687 **Supplementary Table S1.** Baseline TF enrichment method for the four human cell types  
688 from ENCODE and Roadmap DNase-seq datasets are shown. The top 5 identified TFs are  
689 shown for (a) B-cells, (b) T-cells, (c) heart cells, and (d) brain cells. ENCODE accession  
690 IDs for each sample and the dominant TFs and their corresponding  $-\log_{10}(\text{p-value})$  are  
691 shown. There is less cell-type specificity in the identified results.  
692

693 **Supplementary Table S2.** Mouse ENCODE dataset analysis. WhichTF identifies dominant  
694 TFs for four mouse cell types from ENCODE and Roadmap DNase-seq dataset. The top 5  
695 identified dominant TFs are shown for (a) B-cells, (b) T-cells, (c) heart cells, and (d)  
696 hindbrain cells. The ENCODE accession IDs for each sample are shown on the top and the

697 dominant TFs and their corresponding statistical significance, conditional probabilities, are  
698 shown.

699

700 **Supplementary table S3.** The update summary of GREAT ontologies. Ensembl genes is a  
701 flat ontology defined from the set of genes with at least one meaningful annotation in gene  
702 ontology (Online Methods). GO: gene ontology. HPO: human phenotype ontology. MGI:  
703 mouse genome informatics.

704

705 **Supplementary Table S4.** Human ENCODE datasets. The list of ENCODE accession IDs  
706 used in our study and the corresponding cell type or tissues.

707

708 **Supplementary Table S5.** Mouse ENCODE datasets. The list of ENCODE accession IDs  
709 used in our study and the corresponding cell type or tissues.

710

711 **Supplementary Table S6.** Mesoderm development samples. The list of sample IDs, sample  
712 description, and the reference to the corresponding results.

713

714 **Supplementary Table S7.** Sequence read archive (SRA) accession IDs for systemic lupus  
715 erythematosus dataset. SLE indicates disease and HC indicates healthy control.

716
